# Supplementary material for: Identifying plant genes shaping microbiota composition in the barley rhizosphere
Source: PubMed Central journal article supplement (PMC9203816; doi:10.1038/s41467-022-31022-y), 2022-06-16
Supplement: 41467_2022_31022_MOESM3_ESM.pdf [file 41467_2022_31022_MOESM3_ESM.pdf]

### **Description of Additional Supplementary Files**

File Name: Supplementary Data 1

Description: Database containing the LOD score results of the mapping analysis at ASV, genus and family level. Source data are provided as a Source Data file.

File Name: Supplementary Data 2

Description: Database including the statistical comparisons of the polar and non-polar data compounds across different barley genotypes and unplanted control. Source data are provided as a Source Data file.

File Name: Supplementary Data 3

Description: Database describing the 50K iSelect SNP genotyping information of the sibling and the parental lines.

File Name: Supplementary Data 4

Description: Database describing the 34 differentially expressed genes in 124\_52 -124\_17 comparison group, with information on Log<sub>2</sub> FC, physical position, predicted annotation, and underlying genetic information for 124\_52 and 124\_17. Source data are provided as a Source Data file.

File Name: Supplementary Data 5

Description: : Database describing the 59 BaRTv2 genes with physical positions in the QRMC-3HS locus, with annotation and expression information. Source data are accessible at [https://ics.hutton.ac.uk/barleyrtd/bart\\_v2\\_18.html](https://ics.hutton.ac.uk/barleyrtd/bart_v2_18.html).

File Name: Supplementary Data 6

Description: Database containing a description of the results of variant calling for expressed genes with SnpEff annotation. Source data are provided as a Source Data file.
